# Supplementary material for: Hydrothermal synthesis and formation mechanism of Aurivillius Bi5Fe0.9Co0.1Ti3O15nanosheets
Source: Royal Society of Chemistry journal article supplement (doi:10.1039/c6ce00436a), 2016-01-01
Supplement: c6ce00436a1.pdf [file c6ce00436a1.pdf]

## Electronic Supplementary Information

# Hydrothermal synthesis and formation mechanism of Aurivillius $\text{Bi}_5\text{Fe}_{0.9}\text{Co}_{0.1}\text{Ti}_3\text{O}_{15}$ nanosheets

Tong Chen,<sup>a</sup> Zhiang Li,<sup>a</sup> Jifang Chen,<sup>a</sup> Wen Ge,<sup>a</sup> Min Liu<sup>\*ac</sup> and Yalin Lu<sup>\*abcd</sup>

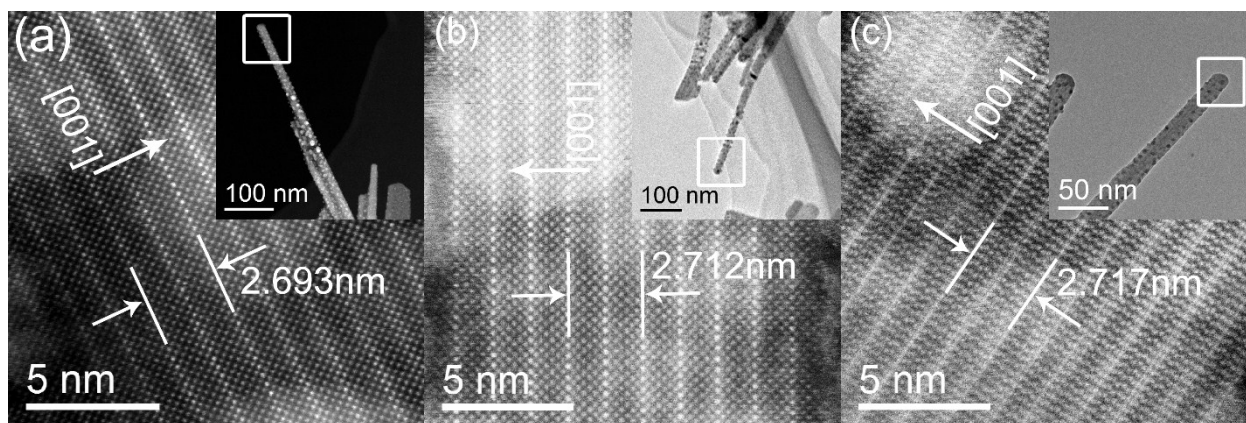

**Fig. 1** STEM-HAADF images of marked part of single nanorods hydrothermally treated for (a) 9h; (b) 10.5 h; and 15 h, and the insets are the corresponding TEM images.
